# Supplementary material for: Synthetic Activators of Cell Migration Designed by Constructive Machine Learning
Source: PubMed Central journal article supplement — ChemistryOpen. 2019 Oct 23;8(10):1303–8. doi: 10.1002/open.201900222 (PMC6807213; doi:10.1002/open.201900222), 2019-10-23
Supplement: OPEN-8-1303-s001.pdf [file OPEN-8-1303-s001.pdf]

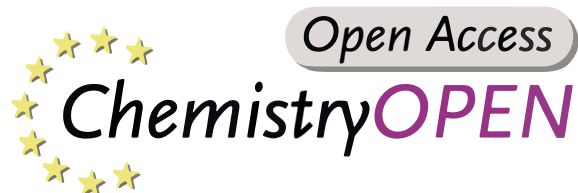

## Supporting Information

© Copyright Wiley-VCH Verlag GmbH & Co. KGaA, 69451 Weinheim, 2019

### **Synthetic Activators of Cell Migration Designed by Constructive Machine Learning**

Dominique Bruns, Daniel Merk, Karthiga Santhana Kumar, Martin Baumgartner,\* and Gisbert Schneider\* © 2019 The Authors. Published by Wiley-VCH Verlag GmbH & Co. KGaA. This is an open access article under the terms of the Creative Commons Attribution Non-Commercial NoDerivs License, which permits use and distribution in any medium, provided the original work is properly cited, the use is non-commercial and no modifications or adaptations are made.

## **Author Contributions**

D.B. Data curation:Lead; Formal analysis:Lead; Investigation:Equal; Methodology:Equal; Writing - Original Draft:Equal

D.M. Conceptualization:Equal; Investigation:Equal; Methodology:Lead; Supervision:Equal; Visualization:Equal; Writing - Original Draft:Equal

K.K. Formal analysis:Supporting; Investigation:Equal; Validation:Supporting; Visualization:Supporting; Writing - Original Draft:Supporting

M.B. Methodology:Equal; Resources:Equal; Writing - Review & Editing:Equal

G.S. Conceptualization:Lead; Formal analysis:Equal; Funding acquisition:Lead; Methodology:Equal; Supervision:-Lead; Writing - Review & Editing:Equal

# Supporting Information

## Table of contents

|                                        |   |
|----------------------------------------|---|
| Supplementary figures and tables ..... | 2 |
|----------------------------------------|---|

## Supplementary figures and tables

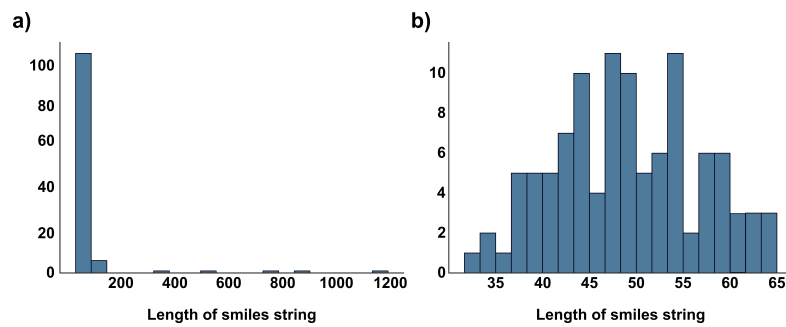

**Figure S1:** SMILES string length distribution of the full CXCR4 active dataset (a) and the set used for fine-tuning with a cutoff of 74 characters (b).

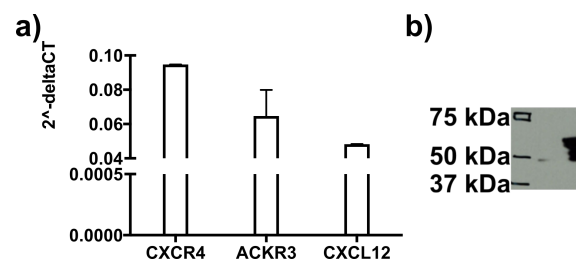

**Figure S2:** Expression of CXCR4 in DAOY cells. (a) CXCR4, ACKR3 and CXCL12 expression in DAOY cells determined on mRNA level by q-RT-PCR. (b) CXCR4 expression in DAOY cells determined by western blot (AB1846).

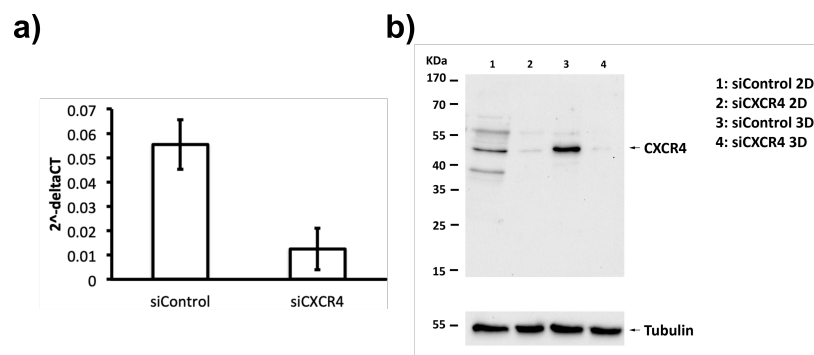

**Figure S3:** Expression of CXCR4 in DAOY cells after RNAi mediated knockdown. CXCR4 targeting siRNA markedly reduced CXCR4 expression in DAOY cells on mRNA (qRT-PCR, left) and protein level (western blot, right). Non-targeting siRNA had no effect on CXCR4 expression.

**Table S1:** Composition of the active set used to fine-tune the generative model. Activity is presented as the negative logarithmic IC<sub>50</sub> value of the compounds against CXCR4 from literature.

| SMILES                                                             | pIC <sub>50</sub> | Literature |
|--------------------------------------------------------------------|-------------------|------------|
| <chem>CC1(C)C[n+]2c(CSC(NC3CCCCC3)=[NH+]C3CCCCC3)csc2N1</chem>     | 9                 | 22         |
| <chem>c1sc2[n+](c1CSC(NC1CCCCC1)=[NH+]C1CCCCC1)CCN2</chem>         | 8                 | 22         |
| <chem>CC1(C)C[n+]2c(CSC(NC3CCCCC3)=[NH+]C3CCCCC3)csc2N1</chem>     | 8.7               | 22         |
| <chem>c1sc2[n+](c1CSC(NC1CCCCC1)=[NH+]C1CCCCC1)CCN2</chem>         | 8.5               | 22         |
| <chem>NCCCN(Cc1nc2ccccc2[nH]1)C1CCc2cccnc21</chem>                 | 7.2               | 23         |
| <chem>NCCCCCN(Cc1nc2ccccc2[nH]1)C1CCc2cccnc21</chem>               | 7.1               | 23         |
| <chem>NCCCN(Cc1nc2ccccc2[nH]1)C1CCc2cccnc21</chem>                 | 8                 | 23, 24, 27 |
| <chem>CON=Cc1ccc(CN(Cc2nc3ccccc3[nH]2)C2CCc3cccnc32)c(CN)c1</chem> | 8.3               | 25         |
| <chem>COc1ccc(CN(Cc2nc3ccccc3[nH]2)C2CCc3cccnc32)c(CN)c1</chem>    | 8.3               | 25         |
| <chem>NCc1ccc(CN(Cc2nc3ccccc3[nH]2)C2CCc3cccnc32)c(CN)c1</chem>    | 8                 | 25         |
| <chem>NCc1ncccc1CN(Cc1nc2ccccc2[nH]1)C1CCc2cccnc21</chem>          | 7.7               | 25         |
| <chem>NCc1ccnc1CN(Cc1nc2ccccc2[nH]1)C1CCc2cccnc21</chem>           | 6.8               | 25         |
| <chem>Cc1ccnc(C(C)N(CCCCN)Cc2ncccc2C)c1</chem>                     | 8.1               | 26         |
| <chem>CC(c1cccn1)N(CCCCN)Cc1ncccc1C(C)(C)C</chem>                  | 7.7               | 26         |
| <chem>Cc1cnc(CN(CCCCN)C(C)c2cccn2)c(C)c1</chem>                    | 7.7               | 26         |
| <chem>Cc1ccnc1CN(CCCCN)C1CCc2cccnc21</chem>                        | 7.7               | 26         |
| <chem>Cc1cnc(CN(CCCCN)C2CCc3cccnc32)c(C)c1</chem>                  | 7.7               | 26         |
| <chem>Nc1ccnc1CN(CCC[NH3+])C1CCc2cccnc21</chem>                    | 7.6               | 26         |
| <chem>NC(=O)NCCCN(Cc1Cc2ccccc2CN1)C1CCc2cccnc21</chem>             | 8.5               | 27         |
| <chem>NCCCN(Cc1Cc2ccccc2CN1)C1CCc2cccnc21</chem>                   | 8.5               | 27         |
| <chem>CC(=O)NCCCN(Cc1Cc2ccccc2CN1)C1CCc2cccnc21</chem>             | 8.4               | 27         |
| <chem>NCCCN(Cc1CN(S(=O)(=O)c2ccc(Cl)cc2)CCN1)C1CCc2cccnc21</chem>  | 8.7               | 28         |
| <chem>NCCCN(Cc1CN(S(=O)(=O)c2ccccc2)CCN1)C1CCc2cccnc21</chem>      | 8.7               | 28         |
| <chem>Oc1cccc(CN(CCN2CCCC2)CC2CCCN(C3CCCC3)C2)c1</chem>            | 7                 | 29         |
| <chem>COc1ccc(CN(CCN2CCCC2)CC2CCCN(C3CCCC3)C2)cc1O</chem>          | 6.6               | 30         |

**Table S2:** Activity profiling of computer-designed compounds **1** and **2** on molecular targets involved in cell migration. Data are presented as individual percent (%) activity values of the respective control. Compounds were tested in a single concentration of 50  $\mu$ M with two technical replicates. n/d, not determined.

| <b>Target (assays type)</b>  | <b>1</b> | <b>2</b> |
|------------------------------|----------|----------|
| CCR1 (radioligand binding)   | <0       | <0       |
| CCR2 (agonist effect)        | <0       | 11, 31   |
| CCR2 (antagonist effect)     | -1, 4    | 1, 4     |
| CCR4 (agonist effect)        | <0       | <0       |
| CCR4 (antagonist effect)     | -2, 1    | 9, 10    |
| CCR6 (agonist effect)        | <0       | <0       |
| CCR6 (antagonist effect)     | 17, 18   | 9, 16    |
| CCR7 (agonist effect)        | 0        | <0       |
| CCR7 (antagonist effect)     | 3, 6     | 14, 15   |
| CCR8 (agonist effect)        | <0       | <0       |
| CCR8 (antagonist effect)     | 9, 12    | 2, 31    |
| CCR9 (agonist effect)        | 0, 2     | <0       |
| CCR9 (antagonist effect)     | -9, 2    | 8, 10    |
| CCR10 (agonist effect)       | 0        | 0        |
| CCR10 (antagonist effect)    | 14, 21   | 26, 36   |
| CX3CR1 (agonist effect)      | 2        | <0       |
| CX3CR1 (antagonist effect)   | <0       | 2, 12    |
| CXCR1 (agonist effect)       | <0       | <0       |
| CXCR1 (antagonist effect)    | -1, 6    | 2, 9     |
| CXCR2 (agonist effect)       | 0        | 0        |
| CXCR2 (antagonist effect)    | 0, 8     | 4, 9     |
| CXCR3 (agonist effect)       | <0       | <0       |
| CXCR3 (antagonist effect)    | <0       | 1, 12    |
| CXCR5 (agonist effect)       | <0       | <0       |
| CXCR5 (antagonist effect)    | -6, 14   | -4, 2    |
| CXCR6 (agonist effect)       | 1        | <0       |
| CXCR6 (antagonist effect)    | <0       | <0       |
| D1 (agonist effect)          | <0       | 0        |
| D1 (antagonist effect)       | <0       | <0       |
| D2L (antagonist radioligand) | 0, 1     | 0, 2     |
| D2S (agonist effect)         | 17, 20   | 42, 52   |
| D2S (antagonist effect)      | 15, 26   | n/d      |
| HDAC4 (inhibition)           | <0       | <0       |
| HDAC6 (inhibition)           | <0       | <0       |
| HDAC7 (inhibition)           | 0, 14    | -1, 13   |
| HDAC9 (inhibition)           | -8, 16   | -4       |
| MMP-1 (inhibition)           | 3, 7     | 6, 13    |
| sst1 (agonist effect)        | <0       | 26, 29   |
| sst1 (antagonist effect)     | 0, 2     | -10, 16  |
